# Supplementary material for: Disrupted Value-Directed Strategic Processing in Individuals with Mild Cognitive Impairment: Behavioral and Neural Correlates
Source: MDPI journal article supplement (doi:10.3390/geriatrics7030056), 2022-05-11
Supplement: s1 [file s1]

## Disrupted Value-Directed Strategic Processing in Individuals with Mild Cognitive Impairment: Behavioral and Neural Correlates

Lydia T. Nguyen, Elizabeth A. Lydon, Shraddha A. Shende, Daniel A. Llano, & Raksha A. Mudar

**Table S1.** Statistical Results for the Effects of Version on Behavioral Data.

| Interaction:<br>Version x Value |           |      |
|---------------------------------|-----------|------|
| <b>List 1</b>                   | $F(1,34)$ | 1.55 |
|                                 | $p$       | .222 |
| <b>List 2</b>                   | $F(1,34)$ | 2.48 |
|                                 | $p$       | .124 |
| <b>List 3</b>                   | $F(1,34)$ | 0.06 |
|                                 | $p$       | .803 |
| <b>List 4</b>                   | $F(1,34)$ | 0.01 |
|                                 | $p$       | .912 |
| <b>List 5</b>                   | $F(1,34)$ | 0.53 |
|                                 | $p$       | .474 |

Cells display statistics for interaction effects between version (words in uppercase being assigned to high-value/words in lowercase being assigned to high-value) and value (high-value/low-value) for each of the five lists. There were no significant differences observed across versions.
